# Supplementary material for: Securinine Inhibits Glioblastoma Growth via the PI3K/AKT/mTOR Signaling Pathway
Source: Research Square preprint supplement (doi:10.21203/rs.3.rs-8631591/v1), 2026-01-28
Supplement: Supplementary file 1 [file 86d4177d1833675581cd42fe.docx]

Dear Editorial Team of Cancer Letters,

We are pleased to submit our original research manuscript entitled “Securinine Inhibits Glioblastoma Growth via the PI3K/AKT/mTOR Signaling Pathway” for consideration of publication in Cancer Letters.

To facilitate the processing of our manuscript, we would like to clarify the author contributions and corresponding author arrangements as follows:

1. Co-First Authors Confirmation

We confirm that three authors, Liujie Yuan (Affiliation: Xuzhou Medical University,Xuzhou 221000,China E-mail adress:675697269@qq.com), Shan Jiang (Affiliation: Xuzhou Medical University,Xuzhou 221000,China E-mail adress:jiangshan1245@163.com), and Peizhi Ji (Affiliation: The Affiliated Hospital of Xuzhou Medical University,Xuzhou 221000,China

E-mail adress:jpz2201@163.com), serve as co-first authors of this manuscript. All three have made equal and substantial contributions to the work:

Liujie Yuan: Designed the overall study protocol, conducted key experiments, and collected primary data.

Shan Jiang: Performed data analysis, interpreted the results, and drafted the initial version of the manuscript.

Peizhi Ji: Revised the manuscript critically for intellectual content, verified experimental reproducibility, and prepared supplementary materials.

We kindly request the journal to mark them as co-first authors in the final publication (e.g., with the same symbol “#” after their names and a footnote stating “# These three authors contributed equally to this work”).

2. Corresponding Authors Arrangement

This manuscript designates two corresponding authors with clear divisions of responsibility to ensure efficient communication during the review and publication process:

(1) Major Corresponding Author

- Name:Yuechao Fan

- Affiliation: The Affiliated Hospital of Xuzhou Medical University,Xuzhou 221000,China

E-mail adress:fyc626@163.com

- Responsibilities: Oversees the entire submission process, approves all revisions, provides final responses to reviewers’ comments, and confirms publication details with the editorial office.

(2) Minor Corresponding Author

- Name: Zhiyong Jin

- Affiliation: Institute of Nervous System Diseases, Xuzhou Medical University, Xuzhou 221002, China，E-mail address: zy.jin@xzhmu.edu.cn

- Responsibilities: Assists the major corresponding author in handling technical inquiries (e.g., providing raw experimental data, clarifying method details) and coordinates communication among co-authors.

All authors have read and approved the final version of the manuscript, and there are no conflicts of interest to declare. We confirm that the manuscript has not been published previously, nor is it under consideration for publication elsewhere.

Thank you for your time and consideration. We look forward to your positive response and are happy to provide any additional information upon request.

Sincerely,

Liujie Yuan

2025-10-16
